# Supplementary material
Source: PubMed Central journal article supplement (PMC4309702)
Supplement: AEM.03389-14_zam999116026so1.pdf [file AEM.03389-14_zam999116026so1.pdf]

## **SUPPLEMENTARY INFORMATION**

# **Comparative Genome Analysis of “*Candidatus* Methanoplasma termitum” Indicates a New Mode of Energy Metabolism in the Seventh Order of Methanogens**

**Kristina Lang<sup>1</sup>, Jörg Schuldes<sup>2</sup>, Andreas Klingl<sup>3</sup>, Anja Poehlein<sup>2</sup>, Rolf Daniel<sup>2</sup>, Andreas Brune<sup>1\*</sup>**

<sup>1</sup>Max Planck Institute for Terrestrial Microbiology, Department of Biogeochemistry, Karl-von-Frisch-Str. 10, 35043 Marburg, Germany.

<sup>2</sup>Institute of Microbiology and Genetics, Georg August University Göttingen, Department of Genomic and Applied Microbiology, and Göttingen Genomics Laboratory, Grisebachstr. 8, 37077 Göttingen, Germany

<sup>3</sup>LOEWE Center for Synthetic Microbiology (SYNMIKRO), Hans-Meerwein-Straße, 35043 Marburg, Germany

## Table of contents

- FIG S1** Alignment of the C-terminus of FpoI of *Methanosarcina* and *Archaeoglobales* species; FpoI-like of *Methanosaeta* and *Methanomassiliicoccales* species; the I subunit of the 11-subunit complex of *Thermoplasmatales* species, *Ca. Aciduliprofundum boonei*, and *Halobacteriales* species; the ferredoxin-reducing subunits of the hydrogenases Hyc and Hyf of *Escherichia coli*; and the Ech hydrogenase of *Methanosarcina barkeri*.
- FIG S2** CO dehydrogenase/acetyl-CoA synthase operon structure of *Methanomassiliicoccus luminyensis*, *Ca. Methanomassiliicoccus intestinalis*, *Acetonema longum*, and *Methanothermobacter marburgensis*.
- FIG S3** Schematic overview of the amino acid anabolism of *Ca. Methanoplasma termitum* and other species of *Methanomassiliicoccales*.
- TABLE S1** Annotated list of genes in the genome of *Candidatus Methanoplasma termitum* strain MpT1. The gene product names and the predicted functions are manually curated. **Please download [Table\\_S1.xlsx](#) for interactive spreadsheet.**
- TABLE S2** Genes encoding the different subunits of Ech hydrogenases in *Methanosarcina barkeri* and their homologs in *Methanomassiliicoccus luminyensis* and *Ca. Methanomassiliicoccus intestinalis* (*Methanomassiliicoccaceae*).
- TABLE S3** Genes encoding the different subunits of Hyc and Hyf hydrogenases in *Escherichia coli* and their homologs in *Ca. Methanoplasma termitum* and *Methanomassiliicoccus luminyensis*. Hyf-like hydrogenases are absent in *Ca. Methanomethylophilus alvus* and *Ca. Methanomassiliicoccus intestinalis*.

|                                               |        |                                                                                                                          |
|-----------------------------------------------|--------|--------------------------------------------------------------------------------------------------------------------------|
| <i>Methanosarcina barkeri</i>                 | FpoI   | KLAR-----EVDLEEGDEK.....                                                                                                 |
| <i>Methanosarcina acetivorans</i>             | FpoI   | KLAR-----EVDLEEGDEK.....                                                                                                 |
| <i>Archaeoglobus profundus</i>                | FpoI   | GRIRGRDLVVVTYEFDLIVR.....                                                                                                |
| <i>Archaeoglobus fulgidus</i>                 | FpoI   | QITVPEIVR-EEQTVVEYYVDRVWTLVRRKELDSLEVPPVAVVVERAACTEPESCLGCRICANVCPQNAIIVEICEISIDEEVVTGTGCVLQIQTDLCTGCGLCVRQCPMQILTLEEVGE |
| <i>Methanosaeta hardundica</i>                | FplI   | DIAVGL-YSDQELAELEEAR-----KAEEEKRRAAEAAAKKREAAKAADEGDKGSGEKAAKKKAE.....                                                   |
| <i>Methanosaeta thermophila</i>               | FplI   | RIAVKQ-FSDKEVAELEAAK-----RQAEERKRAAAAAAKKAAK-----AKGENAKTKPSEGGEA.....                                                   |
| <i>Methanosaeta concilii</i>                  | FplI   | FLATKR-FSAKEVADLEAAK-----RTAAEKAAKRAAAADAAAAGDKKPAKEGANAEKRAVAKPAEGGAS.....                                              |
| <i>Ca. Methanoplasma termitum</i>             | FplI   | RLAYNA-TEKMEVHLEMTLMSDVKNGNSEKRISPFMTDRPVLDQKFCISCKCEKVCVAVKMEVHGVTNAGRPILYPEFNQATCICCCQNCVEDCPKDALHIYEVL.....           |
| <i>Ca. Methanomethylophilus alvus</i>         | FplI   | RLAYDKTTEGMKIVLEETLISDFKSGNGERRVQPFMIDRPELESSKFCISCKCAKVCVAVKMEVHGVTNAGRPILWPEINNETCICCCENCVDACPKDALHIYEVL.....          |
| <i>Ca. Methanomassiliicoccus intestinalis</i> | FplI   | QLQYEG-VPGNEVHILEVLPaelHTG-AAAPPALENKDLPSLEDSKFCIGCSKCVKICPVNAVEMKEMGVNEKGRPIKRPVFDNDCVSCENCVEVCPKDALCMKEVQ.....         |
| <i>Methanomassiliicoccus luminyensis</i>      | FplI   | QLQWPG-VPGNEVHIMEVLPaelHTG-VEPRESILNKDVPVLEDKFCISCKQRCVAVKVCVNAVVMVEAGVNEKGRPVKRPKFDVEKCVACENCVDICPKDALTMQEVQ.....       |
| <i>Thermoplasma acidophilum</i>               | 11_sub | ELEKT-----ESEVKK.....                                                                                                    |
| <i>Ferroplasma acidarmanus</i>                | 11_sub | ELTMQ-----EEDVTK.....                                                                                                    |
| <i>Ca. Aciduliprofundum boonei</i>            | 11_sub | YEIRE-----KSDKEIHMDEVLFREPDIYVPPKPEEEKSS.....                                                                            |
| <i>Haloarcula japonica</i>                    | 11_sub | -----EQLNVPWYKDIIDPLESREPDRGAWIGEGDGEVDYQ.....                                                                           |
| <i>Halococcus hamelinensis</i>                | 11_sub | -----EQLNVPWYKDIIDPLESREPDRGVWIGDGDGEVDYQ.....                                                                           |
| <i>Escherichia coli</i>                       | HycF   | FALCNCRVNRPFAVQKEDIYAIALLKHNKDSRAENHRESFETCPECKRQKCLVPSDRIELTRHMEAI.....                                                 |
| <i>Escherichia coli</i>                       | HyfH   | FHLQRCRSRCPFAQQKTVVALATELLAQQNAPQNREMLWAQASVCFECKQRATLLNDDTDVPLVAKEQL.....                                               |
| <i>Methanosarcina barkeri</i>                 | EchF   | PIVDKPKAPKAAAPS.....                                                                                                     |

**FIG S1** Alignment of the C-terminus of FpoI of *Methanosarcina* and *Archaeoglobales* species; FpoI-like (FplI) of *Methanosaeta* and *Methanomassiliicoccales* species; the I subunit of the 11-subunit complex (11\_sub) of *Thermoplasmatales* species, *Ca. Aciduliprofundum boonei*, and *Halobacteriales* species; the ferredoxin-reducing subunits of the hydrogenases Hyc and Hyf of *Escherichia coli*; and the Ech hydrogenase of *Methanosarcina barkeri*. Amino acids of the same families have the same color; lysine is highlighted in green

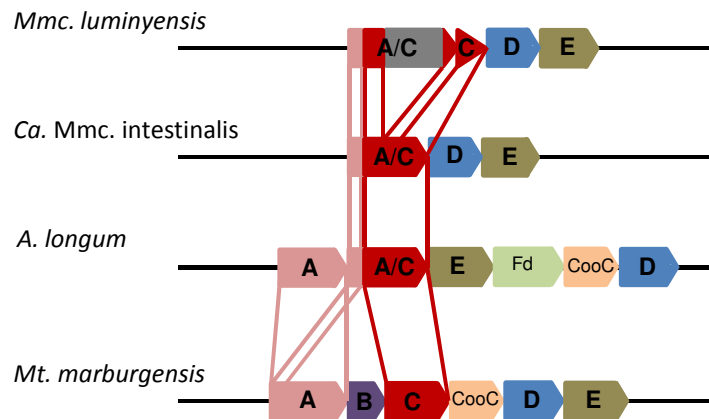

**FIG S2** CO dehydrogenase/acetyl-CoA synthase operon structure of *Methanomassiliicoccus luminyensis*, *Ca. Methanomassiliicoccus intestinalis*, *Acetonea longum*, and *Methanothermobacter marburgensis*. Abbreviations: A, alpha subunit; C, beta subunit; A/C, fused alpha/beta subunit; D, delta subunit; E, gamma subunit; Fd, ferredoxin; CooC, CO dehydrogenase maturation factor; B, epsilon subunit; Fd, Fe-S-cluster-containing protein

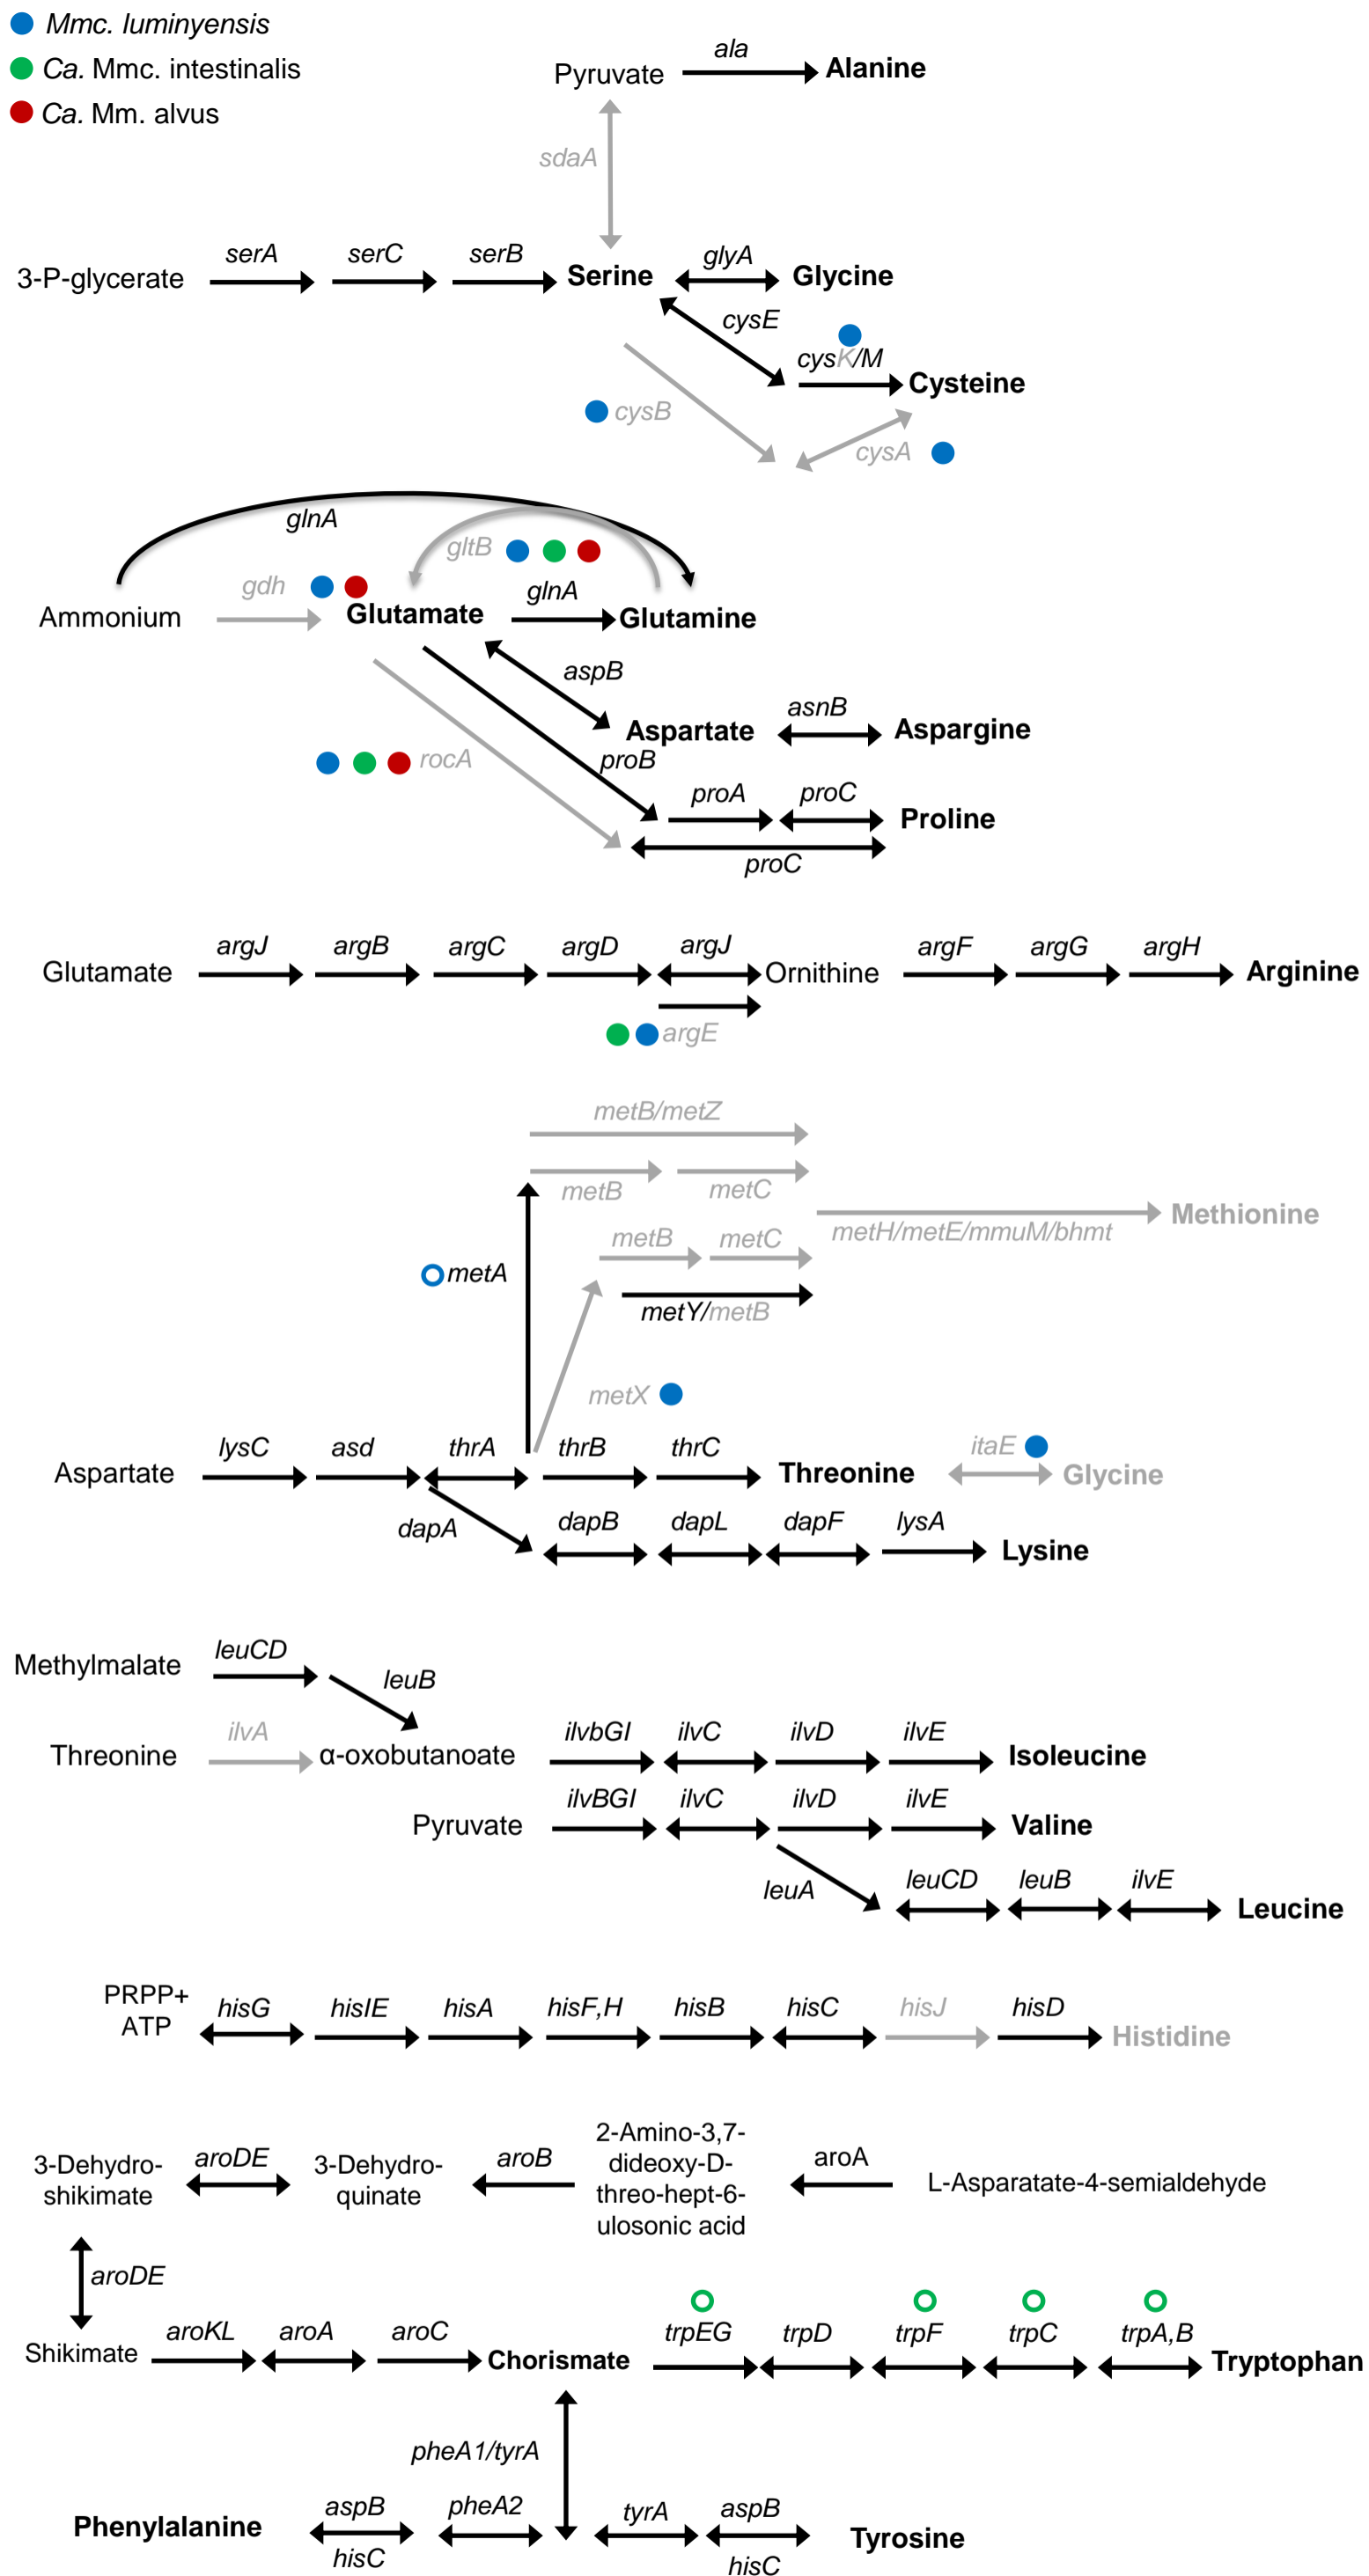

**FIG S3** Schematic overview of the amino acid anabolism of *Ca. Methanoplasma termitum* and other species of *Methanomassiliicoccales*. Genes present in the genome of *Ca. Mp. termitum* are shown in black; an open circle indicates that the gene is absent in the other genomes. Amino acids that cannot be synthesized by *Ca. Mp. termitum* and the corresponding missing genes are shown in gray; colored, filled circles indicate that the genes are present in the other genomes.

**TABLE S1** Annotated list of genes in the genome of *Ca. Methanoplasma termitum*. The gene product names and the predicted functions are manually curated. The genes are listed by gene ID but can be sorted as desired. In addition to the enzyme, the COG, Pfam, Tigrfam, KO, and IMG assignment of each gene product are given. Indicated are the number of nucleotides and deduced amino acids, start and stop coordinates, strand, locus type, and presence of signal peptides and transmembrane helices. **Please download [Table\\_S1.xlsx](#) for interactive spreadsheet.**

**TABLE S2** Genes encoding the different subunits of Ech hydrogenases in *Methanosarcina barkeri* and their homologs in *Methanomassiliicoccus luminyensis* and *Ca. Methanomassiliicoccus intestinalis* (*Methanomassiliicoccaceae*). Ech hydrogenases are absent in members of the intestinal cluster.

|                        | Ech                | Ech-1                   | Ech-1                        | Ech-2                   | Ech-2                        |
|------------------------|--------------------|-------------------------|------------------------------|-------------------------|------------------------------|
|                        | <i>Ms. barkeri</i> | <i>Mmc. luminyensis</i> | <i>Ca. Mmc. intestinalis</i> | <i>Mmc. luminyensis</i> | <i>Ca. Mmc. intestinalis</i> |
| Large subunit          | <i>echE</i>        | WP_019178475            | MMINT_01070                  | WP_019176382            | MMINT_17010                  |
| Small subunit          | <i>echC</i>        | WP_019178473            | MMINT_01050                  | WP_019176384            | MMINT_17030                  |
| 4Fe/4S - Fd            | <i>echF</i>        | WP_019178476            | MMINT_01080                  | – <sup>a</sup>          | MMINT_17000                  |
| Small protein          | <i>echD</i>        | WP_019178474            | MMINT_01060                  | WP_019176383            | MMINT_17020                  |
| Transmembrane proteins | <i>echA</i>        | WP_019178471            | MMINT_01030                  | WP_019176386            | MMINT_17050                  |
|                        | <i>echB</i>        | WP_019178472            | MMINT_01040                  | WP_019176385            | MMINT_17040                  |

<sup>a</sup> Not present

**TABLE S3** Genes encoding the different subunits of Hyc and Hyf hydrogenases in *Escherichia coli* and their homologs in *Ca. Methanoplasma termitum* and *Methanomassiliicoccus luminyensis*. Hyf-like hydrogenases are absent in *Ca. Methanomethylophilus alvus* and *Ca. Methanomassiliicoccus intestinalis*.

|                        | Hyc            | Hyf            | Hyf-like                | Hyf-like                |
|------------------------|----------------|----------------|-------------------------|-------------------------|
|                        | <i>E. coli</i> | <i>E. coli</i> | <i>Ca. Mp. termitum</i> | <i>Mmc. luminyensis</i> |
| Large subunit          | <i>hycE</i>    | <i>hyfG</i>    | Mpt1_c08770             | WP_019178467            |
| Small subunit          | <i>hycG</i>    | <i>hyfI</i>    | Mpt1_c08760             | WP_019178469            |
| 4Fe/4S - Fd            | <i>hycF</i>    | <i>hyfH</i>    | Mpt1_c08760             | WP_019178468            |
| Small protein          | <i>hycE</i>    | <i>hyfG</i>    | Mpt1_00880              | WP_019178467            |
| Transmembrane proteins | <i>hycC</i>    | <i>hyfD</i>    | Mpt1_c08780/8810        | WP_019178466/63         |
|                        | <i>hycD</i>    | <i>hyfC</i>    | Mpt1_c08800             | WP_019178464            |
|                        | – <sup>a</sup> | <i>hyfB,F</i>  | Mpt1_c8810/8780         | WP_019178463/66         |
|                        | –              | <i>hyfE</i>    | Mpt1_c08790             | WP_019178465            |
| Other subunits         | <i>hycBH</i>   | <i>hyfAJR</i>  | –                       | –                       |

<sup>a</sup> Not present
